# Supplementary material for: Consistent Measurement of Parasite-Specific Antigen Levels in Sera of Patients with Neurocysticercosis Using Two Different Monoclonal Antibody (mAb)-Based Enzyme-Linked Immunosorbent Assays
Source: MDPI journal article supplement (doi:10.3390/pathogens12040566), 2023-04-06
Supplement: s1 [file s1]

**Supplementary Materials: Table S1.** Coefficients from Linear regression models to assess the agreement between Ag-ELISA's for measuring antigen levels (expressed as log-OD values) in total study participants, and according to NCC type.

| Variables                    | Crude Model           |          |                       |             | Multivariate Model *  |          |                       |             |
|------------------------------|-----------------------|----------|-----------------------|-------------|-----------------------|----------|-----------------------|-------------|
|                              | $\beta_0$<br>(95% CI) | <i>P</i> | $\beta_1$<br>(95% CI) | <i>P</i> ** | $\beta_0$<br>(95% CI) | <i>P</i> | $\beta_1$<br>(95% CI) | <i>P</i> ** |
| Total<br>(N = 113)           | -0.01<br>(-0.07–0.04) | 0.601    | 0.96<br>(0.90–1.02)   | 0.170       | -0.03<br>(-0.13–0.07) | 0.587    | 0.93<br>(0.85–1.01)   | 0.075       |
| Parenchymal<br>NCC (n = 24)  | 0.04<br>(-0.01–0.09)  | 0.096    | 1.21<br>(0.96–1.46)   | 0.104       | 0.04<br>(-0.11–0.18)  | 0.630    | 1.21<br>(0.98–1.43)   | 0.069       |
| Calcified<br>NCC<br>(n = 41) | 0.08<br>(0.04–0.11)   | <0.001   | 0.21<br>(-0.27–0.69)  | 0.001       | -0.09<br>(-0.33–0.15) | 0.471    | 0.22<br>(-0.23–0.66)  | 0.001       |
| Subarachnoid<br>NCC (n = 48) | 0.24<br>(0.14–0.34)   | <0.001   | 0.82<br>(0.75–0.89)   | <0.001      | 0.18<br>(-0.06–0.43)  | 0.152    | 0.84<br>(0.77–0.90)   | <0.001      |

\* Multivariate model included adjusted by age (years) and sex of participants, \*\* *P* for the hypothesis test that  $\beta_1 = 1$ ).
